# Supplementary material for: Plastome variation and phylogeny of Taxillus (Loranthaceae)
Source: PLoS One. 2021 Aug 18;16(8):e0256345. doi: 10.1371/journal.pone.0256345 (PMC8372910; doi:10.1371/journal.pone.0256345)
Supplement: S5 Table — (XLSX) [file pone.0256345.s014.xlsx]

## Sheet: S5 Table 
S5 Table. Characteristics of complete plastomes in the Taxillus and Scurrula species
Sample	Genome size	GC	Deptha	Nucleotide length (bp)			Number of genes						Publication
	(bp)	(%)	(X)	LSC	SSC	IR	total b	PCGb	tRNA b	rRNA b	missing	Ψ
T. pseudochinensis A	122812	37.3	1727	70878	6104	22915	93	63	26	4	16	4	this study
T. pseudochinensis B	122812	37.3	160	70878	6104	22915	93	63	26	4	16	4	this study
T. tsaii	122635	37.3	6046	70703	6104	22914	93	63	26	4	16	4	this study
T. rhododendricola A	122657	37.3	5179	70723	6104	22915	93	63	26	4	16	4	this study
T. rhododendricola B	122641	37.3	1665	70724	6093	22912	93	63	26	4	16	4	this study
T. rhododendricola C	122591	37.3	888	70729	6090	22886	93	63	26	4	16	4	this study
T. lonicerifolius A	121753	37.3	4557	70076	6097	22790	93	63	26	4	16	4	this study
T. lonicerifolus B	122398	37.3	340	70698	6056	22822	93	63	26	4	16	4	this study
T. levinei	122231	37.3	458	70587	6084	22780	93	63	26	4	16	4	this study
T. liquidambaricola A	123074	37.2	3814	71241	6085	22874	93	63	26	4	16	4	this study
T. liquidambaricola B	122592	37.2	1704	70836	6084	22836	93	63	26	4	16	4	this study
T. liquidambaricola D	122945	37.2	199	71129	6084	22866	93	63	26	4	16	4	this study
T. matsudae A	122319	37.4	3176	70361	6100	22929	92	63	25	4	16	5	this study
T. matsudae B	122342	37.4	246	70340	6100	22951	92	63	25	4	16	5	this study
T. theifer A	122127	37.3	1195	70566	6183	22689	93	63	26	4	16	4	this study
T. theifer B	122128	37.3	612	70567	6183	22689	93	63	26	4	16	4	this study
T. theifer C	122126	37.3	940	70565	6183	22689	93	63	26	4	16	4	this study
T. theifer D	122126	37.3	227	70565	6183	22689	93	63	26	4	16	4	this study
T. theifer E	122131	37.3	222	70570	6183	22689	93	63	26	4	16	4	this study
T. vestitus	122200	37.3	-	70250	6104	22923	93	63	26	4	16	4	Mitochondrial DNA part B 4(2);3188-3189 (2019)
T. sutchuenensis A	122562	37.3	-	70630	6102	22915	93	63	26	4	16	4	Scientific reports 7:12834 (2017)
T. sutchuenensis B	121942	37.3	-	70547	6109	22643	93	63	26	4	16	4	Genome Biol. Evol. 12(1):3663–3676 (2019)
T. nigrans	121419	37.4	-	70181	6100	22569	90	61	25	4	19	4	Mitochondrial DNA part B 4(1):472-473 (2019)
T. yadoriki A	122192	37.3	-	70628	6052	22756	93	63	26	4	16	4	Mitochondrial DNA part B 5(2):3190-3191 (2020)
T. yadoriki B	122191	37.3	619	70627	6052	22756	93	63	26	4	16	4	this study
T. yadoriki C	122188	37.3	446	70624	6052	22756	93	63	26	4	16	4	this study
T. chinensis A	121363	37.3	-	70357	6082	22462	92	61	26	4	18	4	Scientific reports 7:12834 (2017)
T. chinensis B	121364	37.3	-	70358	6082	22462	92	61	26	4	18	4	Genome Biol. Evol. 12(1):3663–3676 (2019)
T. chinensis C	121305	37.4	-	70295	6090	22460	92	61	26	4	18	4	Mitochondrial DNA part B 4(2):3077-3078 (2019)
S. chingii	122764	37.2	-	70905	6091	22884	92	62	26	4	17	4	Mitochondrial DNA part B 6(1):282-284 (2021)
S. parasitica	121750	37.2	-	70270	6106	22687	91	62	26	4	18	3	Mitochondrial DNA part B 4(1):247-248 (2018)
S. notothixoides	123810	37.3	-	71448	6160	23101	90	61	26	4	17	6	Mitochondrial DNA part B 3(2):580-581 (2018)
a Read depth were computed for the plastomes newly generated in this study.
bPseudogenes excluded and only one copy of IR was included.
